# Supplementary material for: Au@ZnO/rGO nanocomposite-based ultra-low detection limit highly sensitive and selective NO2 gas sensor
Source: Royal Society of Chemistry journal article supplement (doi:10.1039/d1tc05835e), 2022-01-01
Supplement: d1tc05835e1.pdf [file d1tc05835e1.pdf]

## Supplementary information

### **Au@ZnO/rGO nanocomposite based ultra-low detection limit, highly sensitive and selective NO<sub>2</sub> gas sensor**

PeiJiang Cao<sup>a</sup>, YongZhi Cai<sup>a</sup>, Dnyandeo Pawar<sup>a,b\*</sup>, Shun Han<sup>a</sup>, WangYin Xu<sup>a</sup>, Ming Fang<sup>a</sup>, XinKe Liu<sup>a</sup>, YuXiang Zeng<sup>a</sup>, WenJun Liu<sup>a</sup>, YouMing Lu<sup>a</sup>, DeLiang Zhu<sup>a\*</sup>

\*Corresponding Authors

E-mails: pawar.dnyandeo@gmail.com; dlzhu@szu.edu.cn

<sup>a</sup>College of Materials Science and Engineering, Shenzhen University; Shenzhen Key Laboratory of Special Functional Materials, Shenzhen Engineering Laboratory for Advanced Technology of Ceramics and Guangdong Research Center for Interfacial Engineering of Functional Materials, Shenzhen 518055, PR China.

<sup>b</sup>Key Laboratory of Optoelectronic Devices and Systems of Ministry of Education and Guangdong Province, College of Optoelectronic Engineering, Shenzhen University, Shenzhen 518060, PR China.

**A. Calculation of theoretical Detection limit & limit of quantification (LOQ):**

1. Generally, the theoretical detection limit (DL) is the minimum concentration in which the sensor response is different from the noise signal. Typically, it is three times to that of standard deviation of noise signal present [1-3].

$$DL \text{ (in ppb)} = 3 \frac{S_D}{\text{Slope}}$$

2. The limit of quantification is the lowest analyte concentration that can be quantitatively detected with a stated accuracy and precision and it is given by:

$$LOQ \text{ (in ppb)} = 10 \frac{S_D}{\text{Slope}}$$

where  $S_D$  is the standard deviation of blank measures.

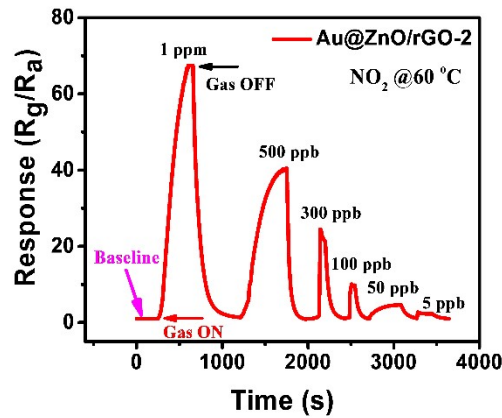

**Fig. 1.** Time-response curve of Au@ZnO/rGO-2 sensor.

The calculation of theoretical detection limit and limit of quantification are performed for Au@ZnO/rGO-2 sample as shown below. The similar procedure is followed for other samples as well.

The following table explains the calculation of theoretical detection limit.

| Parameters/samples | ZnO | Au@ZnO/rGO-1 | Au@ZnO/rGO-2 | Au@ZnO/rGO-3 |
|--------------------|-----|--------------|--------------|--------------|
| N                  | 100 | 100          | 100          | 100          |

|                                    |                            |                         |                         |                           |
|------------------------------------|----------------------------|-------------------------|-------------------------|---------------------------|
| <b>S<sub>D</sub></b>               | 0.00031<br>28              | 0.0006042               | 0.0030708               | 0.0004093                 |
| <b>Slope</b>                       | 0.00255<br>/ppb            | 0.0092 /ppb             | 0.0665 /ppb             | 0.0373 /ppb               |
| <b>LOQ</b>                         | 1.226<br>ppb               | 0.656 ppb               | 0.461 ppb               | 0.109 ppb                 |
| <b>Theoretical Detection limit</b> | 0.368<br>ppb or<br>368 ppt | 0.197 ppb or 197<br>ppt | 0.138 ppb or 138<br>ppt | 0.0329 ppb or<br>32.9 ppt |

### References:

1. A. M. Committee, *Analyst*, 1987, **112**, 199–204.
2. J. Gonzalez-Chavarri, L. Parellada-Monreal, I. Castro-Hurtado, E. Castaño and G. G. Mandayo, *Sensors Actuators B Chem.*, 2018, **255**, 1244–1253.
3. J. Krupčík, P. Májek, R. Gorovenko, J. Blaško, R. Kubinec and P. Sandra, *J. Chromatogr. A*, 2015, **1396**, 117–130.

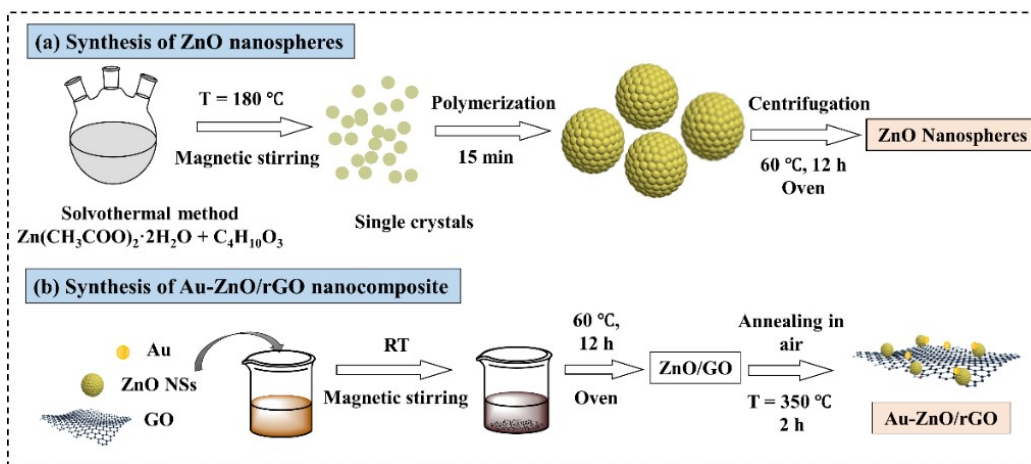

**Figure S1:** Schematic illustration for synthesis of ZnO nanospheres and Au decorated ZnO/rGO nanocomposite.

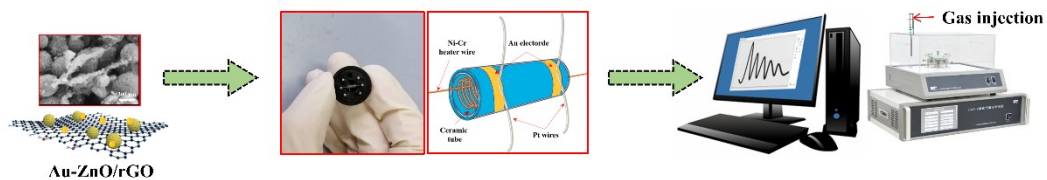

**Figure S2:** Illustration for fabrication of gas sensor device based on  $\text{Au@ZnO/rGO}$  for  $\text{NO}_2$  gas detection.

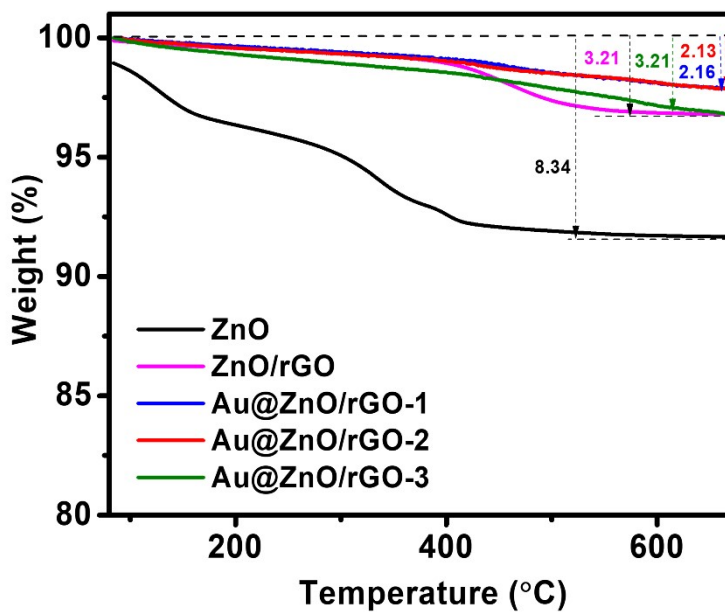

**Figure S3:** Thermogravimetric analysis of ZnO, ZnO/rGO, and Au@ZnO/rGO nanocomposite materials.

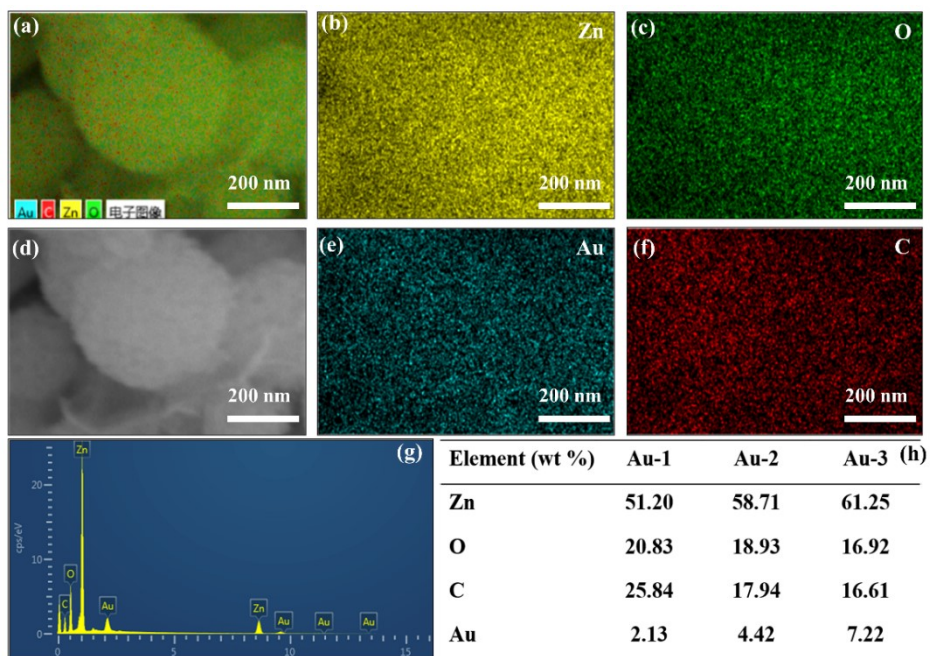

**Figure S4:** (a-g) EDS pattern for elemental composition of Au@ZnO/rGO-2; (h) Table shows the elemental distribution in % for Au@ZnO/rGO-1, Au@ZnO/rGO-2, and Au@ZnO/rGO-3 materials, respectively.

**Figure S5:** N<sub>2</sub> adsorption/desorption curve and pore size distribution (a) (d) for ZnO; (b) (e)

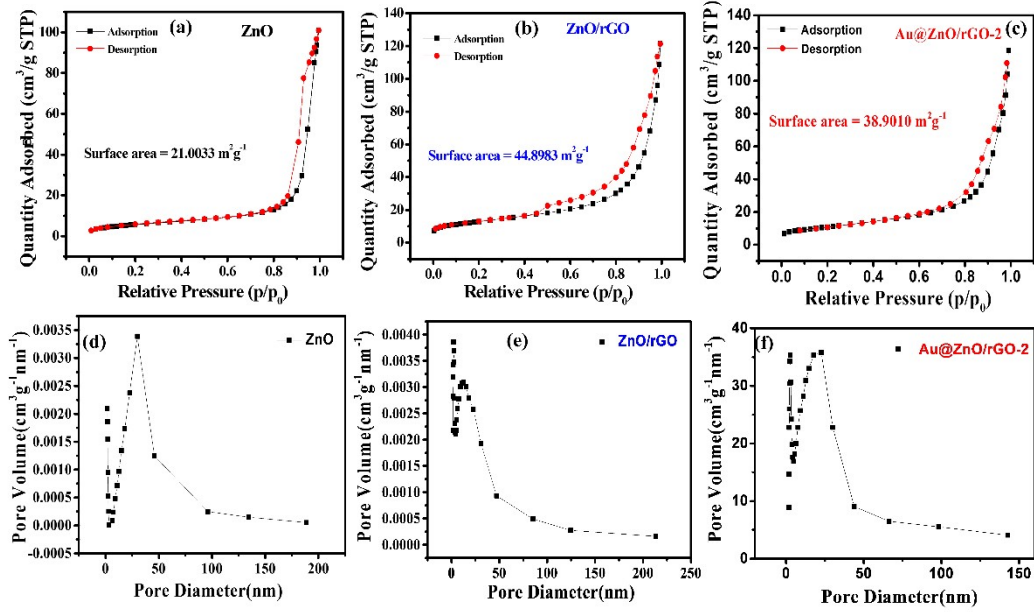

for ZnO/rGO; (c) (f) for Au@ZnO/rGO-2.



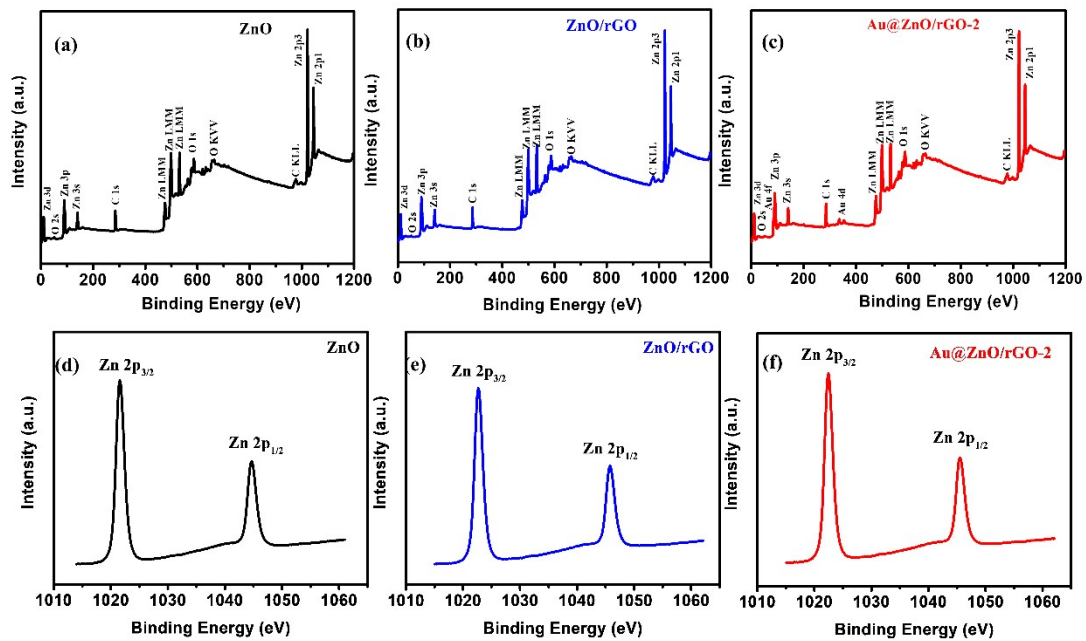

**Figure S6:** XPS survey and their corresponding Zn peak spectrums for (a) and (d) for ZnO; (b) and (e) for ZnO/rGO; (c) and (f) for Au@ZnO/rGO-2 materials.

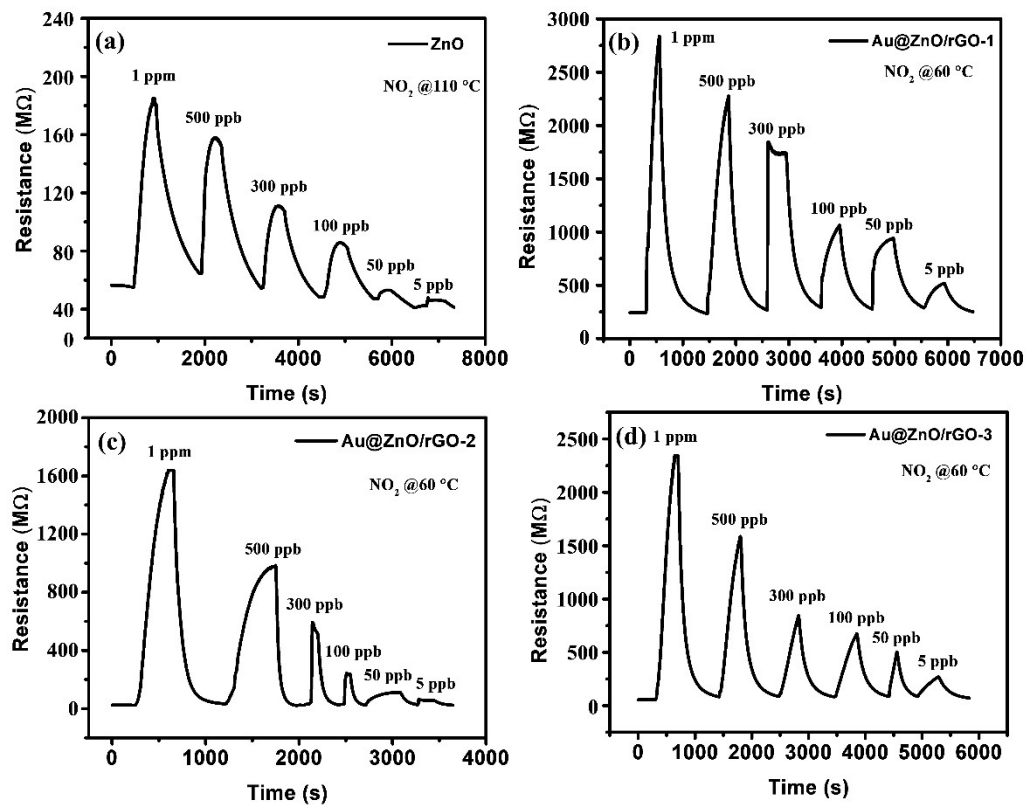

**Figure S7:** Temporal resistance curves for (a) ZnO; (b) Au@ZnO/rGO-1; (c) Au@ZnO/rGO-2; (d) Au@ZnO/rGO-3 sensors to  $\text{NO}_2$  gas concentration in 5 ppb to 1 ppm.

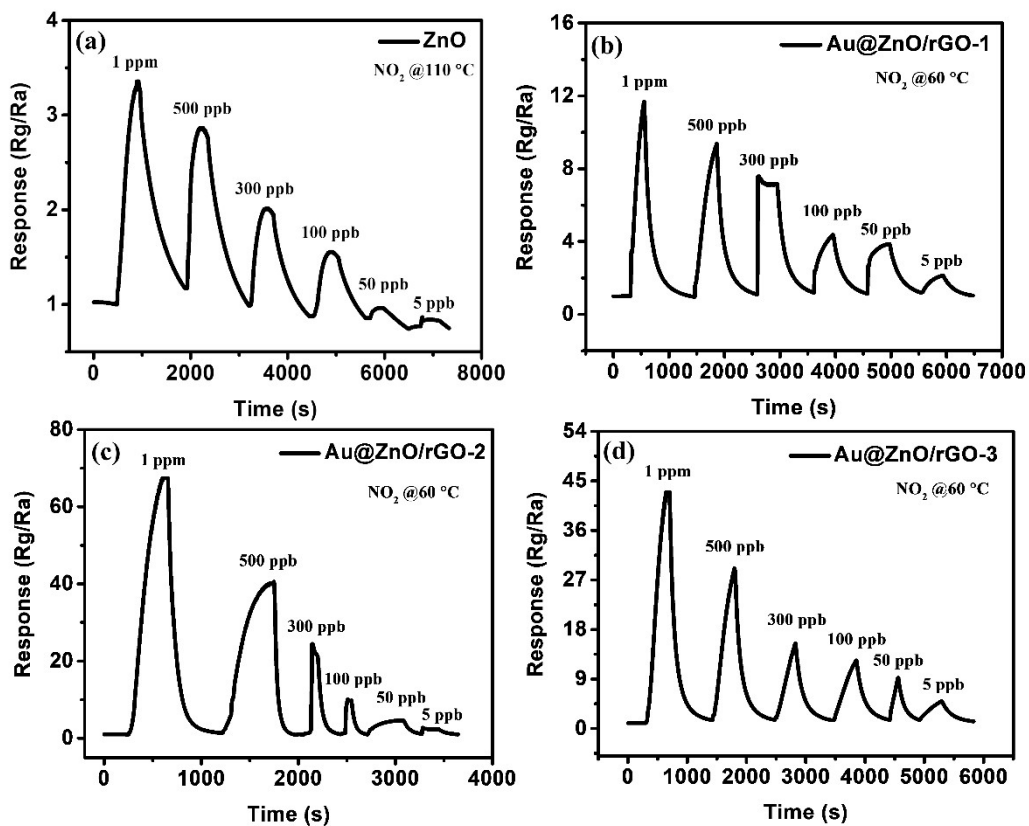

**Figure S8:** Time response curve for (a) ZnO; (b) Au@ZnO/rGO-1; (c) Au@ZnO/rGO-2; (d) Au@ZnO/rGO-3 sensors to  $\text{NO}_2$  gas concentration in 5 ppb to 1 ppm.

**Figure S9:** Repeatability test for (a) ZnO; (b) Au@ZnO/rGO-1; (c) Au@ZnO/rGO-2; (d)

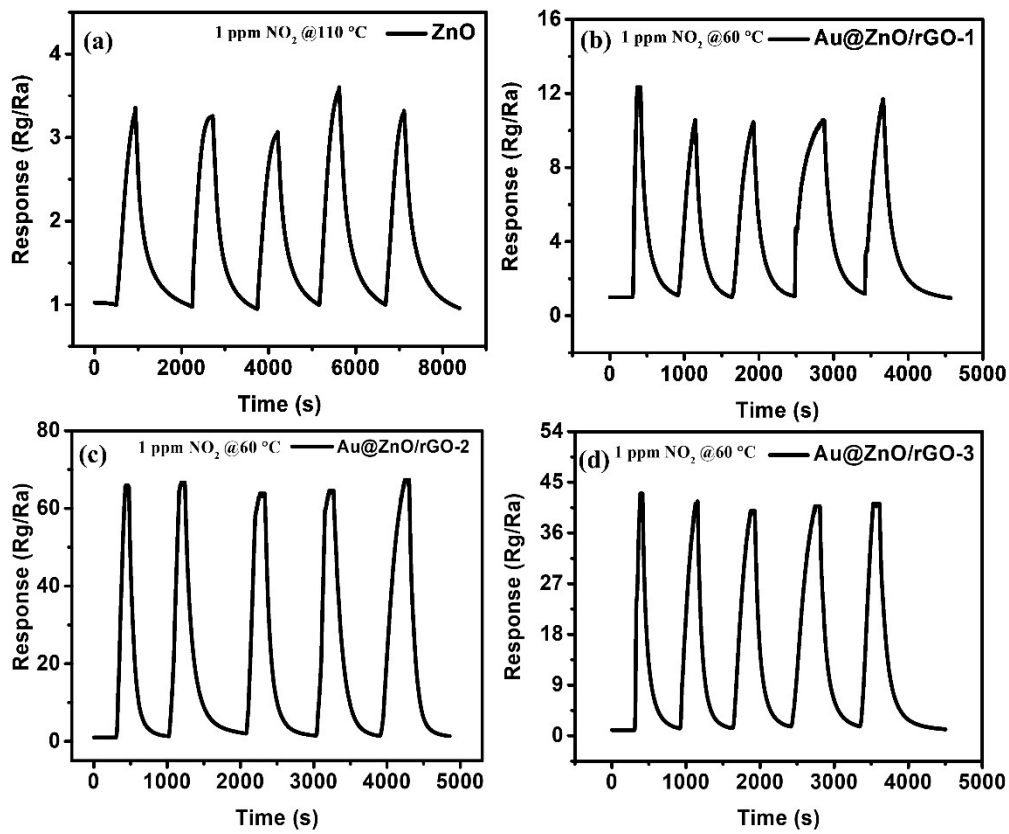

Au@ZnO/rGO-3, respectively.

**Table S1:** Sample description and parameters calculated from XRD patterns of ZnO, Au@ZnO/rGO-1, Au@ZnO/rGO-2 and Au@ZnO/rGO-3.

| <b>Samples</b> | <b>2<math>\theta</math> (hkl)</b> | <b>FWHM (radian)</b> | <b>Crystallite size (nm)</b> |
|----------------|-----------------------------------|----------------------|------------------------------|
| ZnO            | 36.23 (101)                       | 0.013788             | 11.04                        |
| Au-ZnO/rGO-1   | 36.25 (101)                       | 0.010995             | 13.85                        |
| Au-ZnO/rGO-2   | 36.27 (101)                       | 0.010821             | 14.07                        |
| Au-ZnO/rGO-3   | 36.26 (101)                       | 0.010995             | 13.85                        |

**Table S2:** The XPS peak intensity values for ZnO, ZnO/rGO, Au@ZnO/rGO-2, respectively.

| Samples      | $O_L$     |                | $O_V$     |                | $O_C$     |                |
|--------------|-----------|----------------|-----------|----------------|-----------|----------------|
|              | Peak (eV) | Percentage (%) | Peak (eV) | Percentage (%) | Peak (eV) | Percentage (%) |
| ZnO          | 530.1     | 47.4           | 530.9     | 36.8           | 532.3     | 15.8           |
| ZnO/rGO      | 530.4     | 57.1           | 531.4     | 21.0           | 532.3     | 21.9           |
| Au@ZnO/rGO-2 | 530.8     | 72.0           | 531.9     | 15.5           | 532.8     | 12.5           |

**Table S3:** Response values of ZnO, Au@ZnO/rGO-1, Au@ZnO/rGO-2, and Au@ZnO/rGO-3 sensors to NO<sub>2</sub> gas concentration ranging from 5 ppb to 1 ppm.

| <b>Concentration</b> | <b>ZnO</b> | <b>Au@ZnO/rGO-1</b> | <b>Au@ZnO/rGO-2</b> | <b>Au@ZnO/rGO-3</b> |
|----------------------|------------|---------------------|---------------------|---------------------|
| 5 ppb                | 0.839      | 2.095               | 2.314               | 4.843               |
| 50 ppb               | 0.964      | 3.864               | 4.637               | 9.235               |
| 100 ppb              | 1.55       | 4.353               | 9.711               | 12.39               |
| 300 ppb              | 2.014      | 7.169               | 24.417              | 15.506              |
| 500 ppb              | 2.865      | 9.368               | 40.534              | 29.094              |
| 1 ppm                | 3.356      | 11.686              | 67.386              | 42.982              |
